# Supplementary material for: Assessment of potato peel and agro-forestry biochars supplementation on in vitro ruminal fermentation
Source: PeerJ. 2020 Jul 28;8:e9488. doi: 10.7717/peerj.9488 (PMC7394066; doi:10.7717/peerj.9488)
Supplement: Data S1 [file peerj-08-9488-s001.xlsx]

## Sheet: Biochar source and level
Run	Donor cow	Substrate	Biochar source	Biochar inclusion level (%)	Total gas, mL	Total gas, mL/g DM	CH4, mL	CH4, mL/gDM	pH	NH3-N, mg/gDM	Total VFA, mmol/g DM	Acetic acid %	Propionic acid %	Iso-butyric acid, %	Butyric acid, %	Iso-valeric acid, %	Valeric acid, %	Iso-caproic acid, %	Caproic acid, %	Enanthic acid, %	Acetic:propionic acid ratio	H2 generated, mmol/L	H2 consumed, mmol/L	Recovery, %	Fermentation eEfficiency, %
1	1	Corn silage	Potato peel	5	52	217.721	2.06252	8.63564	6.33	15.3085	9.48254	63.0795	19.4399	1.23861	12.4704	1.95284	1.3558	0.00848874	0.426728	0.0277059	3.24492	91.5421	30.2575	33.0532	73.7207
1	1	Corn silage	Potato peel	5	55	230.282	3.60515	15.0946	6.3	14.5235	10.2566	63.5636	19.4493	1.19948	12.1275	1.89347	1.2944	0.0195504	0.424411	0.0283609	3.26836	98.6984	31.9183	32.3393	73.6443
1	1	Corn silage	Potato peel	5	56	234.469	3.69262	15.4608	6.31	13.8169	10.4267	63.5215	19.2784	1.22284	12.242	1.95872	1.32486	0.0141968	0.410289	0.0272496	3.295	100.532	32.6422	32.4695	73.5911
1	2	Corn silage	Potato peel	5	62	259.591	6.29768	26.368	6.29	13.8169	10.3412	60.2992	21.5792	1.24988	12.2278	2.53002	1.57872	0.0170755	0.491342	0.0267892	2.79452	98.4513	34.8348	35.3828	74.8536
1	2	Corn silage	Potato peel	5	62	259.591	4.27352	17.893	6.29	15.3085	10.1524	60.6118	21.4229	1.26707	12.1347	2.50203	1.55699	0.0102344	0.468142	0.0260311	2.82929	96.6535	34.3248	35.5132	74.754
1	2	Corn silage	Potato peel	5	62	259.591	5.99782	25.1126	6.28	13.0319	10.5107	60.793	21.3527	1.21734	12.1171	2.46851	1.54804	0.0122221	0.465065	0.026128	2.84725	100.132	35.0762	35.0298	74.7024
1	1	Haylage	Potato peel	5	41	172.868	2.18096	9.19558	6.37	13.9138	8.94798	65.8414	19.3986	1.22639	9.69149	1.9366	1.49714	0.0166113	0.373366	0.0183953	3.39416	83.4934	25.9681	31.102	73.2357
1	1	Haylage	Potato peel	5	40	168.652	2.92967	12.3524	6.34	14.0719	8.99074	66.7556	18.9571	1.18495	9.43557	1.82456	1.41748	0.0269222	0.370915	0.0268627	3.52352	83.8849	25.1643	29.9985	72.9496
1	1	Haylage	Potato peel	5	44	185.517	3.21899	13.5722	6.39	13.2813	9.62514	66.5697	19.13	1.19235	9.43819	1.84071	1.41982	0.012567	0.367919	0.0288002	3.48086	89.7271	27.2242	30.3411	73.0258
1	2	Haylage	Potato peel	5	53	223.464	4.73857	19.9792	6.35	11.7002	10.0713	66.0722	19.1183	1.21004	9.32543	2.33127	1.52145	0.0120466	0.385731	0.0235445	3.45928	93.7526	28.4605	30.357	73.0587
1	2	Haylage	Potato peel	5	48	202.382	4.22846	17.8284	6.35	17.6294	9.34737	65.3114	19.2736	1.27341	9.64756	2.46115	1.5831	0.0142115	0.409662	0.0259419	3.38893	87.1582	27.0378	31.0215	73.2483
1	2	Haylage	Potato peel	5	55	231.896	5.01063	21.1263	6.35	20.4262	9.38312	65.1044	19.5271	1.25968	9.6735	2.41671	1.58667	0.012648	0.396005	0.0232072	3.33405	87.4308	27.4838	31.435	73.3725
1	1	Corn silage	Agro-forestry	5	61	255.404	5.48608	22.9699	6.34	13.4095	10.1059	62.9306	19.5303	1.2293	12.5551	1.96876	1.32117	0.0158557	0.420399	0.0285286	3.22234	97.6011	32.5078	33.3068	73.7722
1	1	Corn silage	Agro-forestry	5	58	242.843	5.23279	21.9094	6.32	20.1143	10.146	62.9591	19.495	1.22481	12.5268	1.965	1.33934	0.0138394	0.441433	0.0346771	3.22956	97.9582	32.5251	33.203	73.7542
1	1	Corn silage	Agro-forestry	5	58	242.843	5.3231	22.2875	6.3	12.9003	10.1831	63.0631	19.5157	1.20013	12.5066	1.93089	1.31001	0.0158789	0.432322	0.0254727	3.232	98.323	32.6184	33.1747	73.7445
1	2	Corn silage	Agro-forestry	5	54	226.095	5.37155	22.4904	6.3	14.428	11.014	61.7435	21.0776	1.16357	11.6715	2.34803	1.50219	0.0193514	0.453537	0.0207107	2.93083	104.662	36.0158	34.4116	74.4477
1	2	Corn silage	Agro-forestry	5	62	259.591	6.13569	25.6898	6.28	17.2287	10.8822	61.3828	21.2104	1.17838	11.8423	2.37918	1.5003	0.0147096	0.464985	0.026968	2.89595	103.469	36.0368	34.8286	74.5282
1	2	Corn silage	Agro-forestry	5	66	276.339	5.2809	22.1108	6.3	19.011	11.0219	61.7766	21.1708	1.14776	11.6521	2.29215	1.47057	0.0126236	0.451613	0.0257858	2.92084	104.658	36.246	34.6329	74.4409
1	1	Haylage	Agro-forestry	5	47	198.166	2.6815	11.306	6.38	12.3925	8.73171	65.891	19.3282	1.22469	9.70644	1.9145	1.49408	0.0189017	0.39917	0.0229818	3.40939	81.4923	25.2779	31.0188	73.2049
1	1	Haylage	Agro-forestry	5	46	193.95	3.63902	15.3432	6.37	17.5204	9.3061	66.1169	19.3737	1.20056	9.58582	1.84886	1.45088	0.0162625	0.378669	0.028368	3.41406	86.7611	26.6118	30.6725	73.1816
1	1	Haylage	Agro-forestry	5	45	189.733	3.3572	14.1549	6.39	14.1873	9.18877	66.6089	19.0765	1.17804	9.45855	1.83867	1.42732	0.0142974	0.373087	0.0245955	3.49266	85.7166	26.0662	30.4097	73.0108
1	2	Haylage	Agro-forestry	5	51	215.031	3.28808	13.8635	6.36	17.6059	9.2947	65.8243	19.2375	1.2365	9.39991	2.35753	1.51868	0.0198029	0.385048	0.0207716	3.42421	86.5142	26.4998	30.6306	73.1481
1	2	Haylage	Agro-forestry	5	50	210.815	3.86789	16.3082	6.36	19.0588	9.49499	65.6302	19.3706	1.26021	9.42732	2.32665	1.54652	0.0192675	0.399465	0.019732	3.38952	88.3059	27.1075	30.6973	73.2186
1	2	Haylage	Agro-forestry	5	53	223.464	4.91433	20.7203	6.38	25.5542	9.27779	65.0658	19.5036	1.25499	9.71941	2.42238	1.59089	0.0176001	0.406362	0.0189808	3.33682	86.4946	27.0825	31.3113	73.3695
1	1	Corn silage	Potato peel	10	51	213.01	3.13154	13.0794	6.32	16.5091	9.79682	64.0763	19.2999	1.20625	11.7374	1.90759	1.30982	0.0200765	0.416024	0.0266365	3.32065	94.2087	30.4747	32.3481	73.502
1	1	Corn silage	Potato peel	10	50	208.834	2.76916	11.5659	6.03	27.0073	13.7252	62.5202	20.7584	0.968628	12.3625	1.54348	1.31619	0.0109222	0.486946	0.0328306	3.01402	132.07	44.8538	33.9621	74.258
1	1	Corn silage	Potato peel	10	57	238.07	5.33764	22.2936	6.34	22.0122	10.2854	64.1497	19.3038	1.19611	11.7306	1.89185	1.27646	0.0185385	0.405427	0.0274965	3.3256	98.9169	31.6693	32.016	73.4898
1	2	Corn silage	Potato peel	10	62	258.954	5.97909	24.9727	6.31	14.0963	10.0713	62.2065	20.8628	1.17034	11.4837	2.3388	1.47096	0.0105042	0.432878	0.0234671	2.98602	95.8458	32.6447	34.0596	74.2391
1	2	Corn silage	Potato peel	10	61	254.777	6.77956	28.316	6.3	12.4517	10.4179	61.9331	20.9636	1.18651	11.6238	2.35692	1.45915	0.0216797	0.431857	0.0233958	2.95677	99.2233	34.0692	34.3359	74.3484
1	2	Corn silage	Potato peel	10	64	267.307	4.49558	18.7766	6.31	14.6445	10.5872	61.929	20.9086	1.21372	11.5983	2.40941	1.46612	0.0145951	0.432877	0.0273825	2.96477	100.819	34.7557	34.4734	74.3366
1	1	Haylage	Potato peel	10	48	201.808	3.80962	16.0169	6.38	15.1356	9.33015	66.8594	19.2096	1.20068	9.05786	1.90659	1.3957	0.0138348	0.334273	0.022025	3.48242	86.8826	26.2139	30.1716	72.9965
1	1	Haylage	Potato peel	10	40	168.173	2.23022	9.37657	6.4	13.4013	9.64306	67.2081	18.9498	1.2094	8.98058	1.89971	1.39287	0.0110766	0.329463	0.0189855	3.55047	89.8433	26.7208	29.7416	72.8496
1	1	Haylage	Potato peel	10	39	163.969	2.96184	12.4525	6.39	14.7414	9.56964	67.3383	18.7751	1.15104	9.19988	1.77635	1.35711	0.0221739	0.356514	0.0235732	3.59001	89.447	26.3549	29.4643	72.7701
1	2	Haylage	Potato peel	10	44	184.991	3.91447	16.4577	6.38	14.8991	8.54019	66.1905	19.0428	1.2245	9.30431	2.33277	1.48063	0.0146562	0.384774	0.0249907	3.47802	79.7374	24.186	30.332	73.0462
1	2	Haylage	Potato peel	10	51	214.421	4.48834	18.8704	6.42	14.6626	8.28927	66.2383	19.0346	1.21609	9.29878	2.32667	1.47781	0.0216011	0.36861	0.0175712	3.48238	77.3961	23.5718	30.456	72.9919
1	2	Haylage	Potato peel	10	53	222.83	3.50705	14.7448	6.42	14.4261	9.27368	65.8777	19.0975	1.25728	9.43185	2.40958	1.51141	0.0202028	0.374644	0.019786	3.45154	86.641	26.5006	30.5867	73.0675
1	1	Corn silage	Agro-forestry	10	31	129.477	2.45574	10.2568	6.33	13.7047	9.28573	63.1043	19.4004	1.24659	12.4945	1.9684	1.32523	0.0127055	0.421674	0.0261172	3.2533	89.8923	29.2736	32.5652	73.6981
1	1	Corn silage	Agro-forestry	10	59	246.424	5.24912	21.9238	6.34	10.1023	9.73054	63.0558	19.5112	1.26931	12.3105	2.04045	1.34144	0.0142951	0.427127	0.0298494	3.23188	93.9494	31.0417	33.0409	73.7428
1	1	Corn silage	Agro-forestry	10	56	233.894	2.27819	9.51526	6.32	9.86739	9.3553	62.5498	19.6401	1.27467	12.6313	2.04974	1.37178	0.0171292	0.435131	0.0303913	3.18511	90.54	30.337	33.5067	73.8666
1	2	Corn silage	Agro-forestry	10	58	242.247	5.67298	23.6942	6.29	14.4095	9.52642	60.345	21.4615	1.27528	12.2416	2.572	1.59251	0.0140134	0.470906	0.0271927	2.81205	90.9811	31.8527	35.0102	74.8058
1	2	Corn silage	Agro-forestry	10	60	250.6	5.9626	24.9038	6.3	16.6806	9.64253	59.9404	21.6957	1.28657	12.3846	2.58198	1.59333	0.0115597	0.477577	0.0282833	2.76322	92.0966	33.1476	35.9922	74.9486
1	2	Corn silage	Agro-forestry	10	59	246.424	5.90947	24.6819	6.32	14.018	9.33598	59.9183	21.7707	1.28138	12.3139	2.58475	1.60077	0.0232608	0.477831	0.0290735	2.75335	89.0641	32.1158	36.0592	74.9702
1	1	Haylage	Agro-forestry	10	50	210.217	3.82389	16.0769	6.41	12.6918	8.86492	65.1828	19.5338	1.29651	9.97439	2.0561	1.52284	0.0200337	0.386985	0.0265651	3.33997	83.0432	26.256	31.6173	73.345
1	1	Haylage	Agro-forestry	10	47	197.604	3.0882	12.9838	6.41	12.9283	8.85816	65.4371	19.4741	1.28386	9.86361	2.01125	1.5025	0.0167574	0.386333	0.0244624	3.36127	82.9353	25.9114	31.2429	73.3105
1	1	Haylage	Agro-forestry	10	46	193.399	3.52064	14.8019	6.42	13.9531	8.58791	65.103	19.5026	1.31522	10.0589	2.08174	1.51754	0.0109017	0.385143	0.0250114	3.33971	80.5211	25.2024	31.2991	73.3584
1	2	Haylage	Agro-forestry	10	46	193.399	3.90804	16.4307	6.4	17.3429	7.79519	64.2499	19.7334	1.34519	10.0087	2.58317	1.6303	0.010585	0.41258	0.0263005	3.25741	72.9388	23.2376	31.859	73.5733
1	2	Haylage	Agro-forestry	10	44	184.991	4.16246	17.5003	6.33	15.9239	8.51319	64.301	19.5999	1.33803	10.0507	2.60407	1.64471	0.0174944	0.416874	0.0271751	3.28391	79.7309	25.2214	31.6332	73.4868
1	2	Haylage	Agro-forestry	10	47	197.604	3.08677	12.9778	6.35	16.6334	8.55792	64.4495	19.5166	1.33321	10.0218	2.57946	1.62435	0.0198128	0.42589	0.0293636	3.30474	80.1443	25.3543	31.6358	73.4324
2	1	Corn silage	Potato peel	5	67	280.525	6.73522	28.2	6.39	14.0944	12.9684	65.7329	14.8622	1.2739	13.3098	2.66884	1.40977	0.0162043	0.686726	0.039573	4.42293	128.665	36.4857	28.357	71.7018
2	1	Corn silage	Potato peel	5	60	251.217	4.12036	17.2517	6.36	13.2337	13.5455	66.7474	14.7107	1.20912	12.7645	2.52073	1.33369	0.0220444	0.64939	0.0424338	4.53788	133.921	36.7822	27.4657	71.5082
2	1	Corn silage	Potato peel	5	63	263.778	6.41338	26.8525	6.34	9.79447	14.2798	66.5644	14.6929	1.19556	12.9796	2.50259	1.35049	0.0139551	0.662543	0.0379842	4.53094	141.502	39.2694	27.7519	71.532
2	2	Corn silage	Potato peel	5	56	234.469	4.99844	20.9282	6.35	10.5421	13.1334	63.5606	19.9287	1.13863	11.8746	1.89731	1.36156	0.0171412	0.210898	0.0106434	3.18969	126.143	41.4345	32.8473	73.8177
2	2	Corn silage	Potato peel	5	56	234.469	5.27552	22.0883	6.34	11.2898	13.1803	63.6026	19.9348	1.14166	11.7916	1.93508	1.37711	0.0103631	0.197046	0.00981973	3.1906	126.507	41.8529	33.0834	73.8115
2	2	Corn silage	Potato peel	5	55	230.282	5.18132	21.6939	6.33	13.3833	12.9785	63.4847	19.8303	1.12384	12.0247	1.93418	1.38263	0.0128213	0.202116	0.00476254	3.20139	124.944	41.0517	32.856	73.7945
2	1	Haylage	Potato peel	5	52	219.247	5.23678	22.0798	6.4	13.0253	12.6475	67.0522	16.2203	1.27776	10.8138	2.56435	1.53834	0.0187892	0.488135	0.0262933	4.1339	121.063	34.0171	28.0987	71.9452
2	1	Haylage	Potato peel	5	50	210.815	5.03537	21.2306	6.44	13.7783	12.9726	67.9404	15.8746	1.24941	10.4565	2.48115	1.4897	0.0135524	0.468321	0.0263748	4.28186	124.01	33.6731	27.1536	71.6905
2	1	Haylage	Potato peel	5	49	206.599	3.79451	15.9988	6.43	12.9501	12.5994	67.1882	16.1453	1.28699	10.7794	2.55106	1.52592	0.0162305	0.484366	0.0224095	4.16147	120.605	33.6224	27.8782	71.8966
2	2	Haylage	Potato peel	5	43	181.301	2.00326	8.44635	6.48	10.3902	11.1196	65.8787	20.8793	1.21226	8.07449	2.13829	1.6362	0.0166131	0.158462	0.00568223	3.15575	101.525	31.9958	31.5153	73.696
2	2	Haylage	Potato peel	5	41	172.868	3.15372	13.297	6.41	25.6742	11.7154	66.6571	20.7648	1.16891	7.65599	2.01996	1.566	0.011795	0.150639	0.00477305	3.2101	106.629	33.1528	31.0917	73.5525
2	2	Haylage	Potato peel	5	38	160.219	3.02496	12.7541	6.37	13.4771	11.3207	65.6668	21.0278	1.21282	8.16298	2.13367	1.6255	0.014306	0.149059	0.00709121	3.12365	103.379	32.9293	31.853	73.7684
2	1	Corn silage	Agro-forestry	5	64	267.965	4.93806	20.6754	6.38	13.3833	12.9444	65.6494	14.932	1.27574	13.2061	2.72822	1.43804	0.0153201	0.712227	0.043034	4.39698	128.219	36.5531	28.5085	71.7274
2	1	Corn silage	Agro-forestry	5	62	259.591	6.10972	25.5811	6.35	10.0935	14.2662	66.5974	14.767	1.22609	12.7748	2.55993	1.35931	0.0102707	0.664143	0.0410706	4.51016	141.002	39.3373	27.8984	71.5502
2	1	Corn silage	Agro-forestry	5	63	263.778	4.91475	20.5778	6.31	11.0655	14.2037	66.8115	14.6398	1.2127	12.761	2.53471	1.35042	0.0125726	0.642893	0.0343331	4.56394	140.504	38.9737	27.7384	71.477
2	2	Corn silage	Agro-forestry	5	59	247.03	5.55796	23.2709	6.34	8.5982	12.9927	63.5357	19.7256	1.14708	11.9677	2.00836	1.39164	0.0160079	0.203292	0.00459859	3.22099	125.034	41.0098	32.7988	73.747
2	2	Corn silage	Agro-forestry	5	58	242.843	5.41271	22.6627	6.32	17.1216	12.733	63.885	19.8394	1.13737	11.5744	1.95691	1.39046	0.0162135	0.194705	0.00556662	3.22039	122	40.0191	32.8026	73.7171
2	2	Corn silage	Agro-forestry	5	57	238.656	3.03063	12.6891	6.33	12.187	13.0004	64.4316	19.6275	1.15125	11.2431	1.94984	1.38009	0.0201515	0.190509	0.00590046	3.28279	124.279	40.2462	32.3838	73.5634
2	1	Haylage	Agro-forestry	5	50	210.815	3.24105	13.6652	6.38	13.8535	12.6296	67.1595	16.2312	1.29239	10.7487	2.53042	1.5229	0.0182063	0.471232	0.0254183	4.13892	120.801	33.7909	27.9723	71.9127
2	1	Haylage	Agro-forestry	5	48	202.382	3.0956	13.0519	6.37	12.7995	12.7117	67.1268	16.2374	1.30905	10.7288	2.56705	1.5223	0.0111158	0.470749	0.0267013	4.13456	121.533	33.8104	27.8199	71.9211
2	1	Haylage	Agro-forestry	5	46	193.95	4.53422	19.1176	6.43	19.1992	12.9318	67.3722	16.1543	1.27576	10.6896	2.4948	1.51201	0.012405	0.466355	0.0225001	4.17066	123.702	34.4164	27.822	71.8684
2	2	Haylage	Agro-forestry	5	40	168.652	1.80374	7.6051	6.43	13.1759	11.2511	66.3061	20.8617	1.22742	7.70689	2.12834	1.60956	0.00808208	0.148341	0.00365245	3.17952	102.34	31.859	31.1305	73.5962
2	2	Haylage	Agro-forestry	5	41	172.868	1.63916	6.91117	6.38	13.4018	11.648	66.6233	20.672	1.19867	7.72827	2.04698	1.56917	0.0113786	0.14807	0.00207457	3.22328	106.122	32.7338	30.8453	73.5118
2	2	Haylage	Agro-forestry	5	41	172.868	2.02249	8.52742	6.38	13.2512	11.5949	66.2261	20.8191	1.19758	7.89064	2.08289	1.61397	0.0126989	0.151249	0.00579997	3.18121	105.727	33.1143	31.3206	73.6298
2	1	Corn silage	Potato peel	10	60	250.6	4.76166	19.8879	6.36	13.3504	12.8147	65.9559	14.8423	1.29491	13.0461	2.69469	1.4219	0.015762	0.689191	0.0392025	4.44435	127.108	35.8206	28.1813	71.6468
2	1	Corn silage	Potato peel	10	58	242.247	5.82742	24.3392	6.35	11.2621	12.6684	65.7783	14.9851	1.2848	13.1456	2.68814	1.39756	0.0124021	0.662235	0.0458808	4.39007	125.731	35.4147	28.167	71.7236
2	1	Corn silage	Potato peel	10	64	267.307	4.96606	20.7416	6.32	12.6046	13.4687	66.1058	14.983	1.27049	12.8722	2.65556	1.40123	0.0178053	0.658218	0.035639	4.41238	133.366	37.3189	27.9823	71.6797
2	2	Corn silage	Potato peel	10	54	225.54	4.16091	17.3787	6.35	10.6654	12.3436	63.7229	19.6131	1.21606	11.6653	2.10201	1.45289	0.0169039	0.203817	0.00704989	3.24919	118.694	38.745	32.6426	73.6595
2	2	Corn silage	Potato peel	10	57	238.07	3.98423	16.6408	6.34	15.9609	12.6224	63.3366	19.5419	1.22747	12.0591	2.14626	1.45909	0.0113767	0.209428	0.0087554	3.24179	121.865	39.9542	32.7856	73.6846
2	2	Corn silage	Potato peel	10	57	238.07	5.86224	24.4847	6.36	16.2592	12.2434	63.1426	19.967	1.19078	11.9809	2.06453	1.43318	0.0135782	0.199386	0.00806107	3.16284	117.92	39.3862	33.4009	73.8661
2	1	Haylage	Potato peel	10	48	201.808	3.02048	12.6991	6.38	15.3158	12.03	66.8667	16.2447	1.33627	10.865	2.64158	1.52366	0.0128605	0.482196	0.0270658	4.11677	115.452	32.3908	28.0555	71.9578
2	1	Haylage	Potato peel	10	48	201.808	3.37861	14.2048	6.4	16.4419	12.1952	66.7609	16.3652	1.32844	10.8568	2.63066	1.53834	0.0157461	0.473026	0.0308599	4.08004	116.955	32.9156	28.1438	72.0122
2	1	Haylage	Potato peel	10	51	214.421	4.27408	17.9696	6.41	12.4628	12.3211	66.8514	16.3245	1.29982	10.8902	2.59191	1.51648	0.0132946	0.488516	0.0238709	4.09607	118.261	33.0749	27.9677	71.9899
2	2	Haylage	Potato peel	10	42	176.582	1.51821	6.38306	6.46	12.9133	10.9537	66.1553	21.0792	1.19912	7.75426	2.05366	1.59503	0.0107361	0.146439	0.00623839	3.13933	99.88	31.3294	31.367	73.7037
2	2	Haylage	Potato peel	10	42	176.582	1.36164	5.72476	6.42	12.8382	11.158	65.6742	21.0322	1.18861	8.16271	2.07525	1.59488	0.012545	0.155047	0.104505	3.12375	102.113	32.4784	31.8063	73.7612
2	2	Haylage	Potato peel	10	45	189.195	3.18163	13.3766	6.49	15.6912	11.2114	65.9141	20.9653	1.20576	8.06684	2.07466	1.59321	0.0180413	0.154304	0.00769991	3.14535	102.598	32.4408	31.6194	73.6918
2	1	Corn silage	Agro-forestry	10	63	263.13	6.69166	27.9489	6.38	15.5134	12.2884	65.678	14.9496	1.29337	13.2186	2.70638	1.4181	0.0223935	0.675177	0.0383486	4.39429	122.024	34.2366	28.0574	71.7206
2	1	Corn silage	Agro-forestry	10	63	263.13	2.69345	11.2497	6.32	9.69585	13.1072	65.7048	14.998	1.2882	13.1602	2.69872	1.41191	0.0113754	0.68068	0.0462077	4.38118	130.075	36.9513	28.4077	71.7438
2	1	Corn silage	Agro-forestry	10	61	254.777	6.66497	27.8374	6.33	18.795	12.9687	65.4243	15.1472	1.30288	13.2256	2.72801	1.4234	0.0147649	0.695471	0.0383566	4.31965	128.65	36.87	28.6592	71.8311
2	2	Corn silage	Agro-forestry	10	58	242.247	5.92684	24.7545	6.39	12.2317	12.2391	63.0699	19.987	1.22134	11.9205	2.1224	1.45863	0.0131478	0.201058	0.00603825	3.15605	117.759	38.5655	32.7494	73.8788
2	2	Corn silage	Agro-forestry	10	55	229.717	5.09186	21.267	6.35	14.32	12.2253	62.7732	20.0749	1.19039	12.205	2.08393	1.44802	0.0129629	0.20577	0.00572691	3.1275	117.945	39.5308	33.5164	73.9633
2	2	Corn silage	Agro-forestry	10	49	204.657	4.5985	19.2064	6.34	12.3063	11.6858	62.3018	20.294	1.24461	12.291	2.13724	1.49257	0.018639	0.213823	0.00638947	3.07061	112.643	38.1943	33.9075	74.1063
2	1	Haylage	Agro-forestry	10	47	197.604	4.18794	17.6075	6.39	14.7902	11.9711	66.291	16.6377	1.31203	11.0634	2.61425	1.54268	0.0147123	0.500227	0.0239643	3.98527	114.893	33.1593	28.861	72.1789
2	1	Haylage	Agro-forestry	10	49	206.012	4.09526	17.2178	6.39	12.5379	11.6338	66.2111	16.4826	1.3546	11.1266	2.70329	1.57814	0.0119505	0.501074	0.0307149	4.01761	111.769	31.9781	28.611	72.1429
2	1	Haylage	Agro-forestry	10	46	193.399	4.10893	17.2753	6.38	12.4628	11.5619	66.2088	16.4545	1.34295	11.2001	2.68038	1.57047	0.00989834	0.512345	0.0205315	4.02479	111.185	31.7111	28.5211	72.1284
2	2	Haylage	Agro-forestry	10	39	163.969	2.81637	11.841	6.44	21.6223	11.0329	65.6239	21.1832	1.25098	7.97991	2.15426	1.63194	0.0174751	0.154786	0.00361502	3.09861	100.725	31.9649	31.7348	73.8236
2	2	Haylage	Agro-forestry	10	59	248.055	4.36189	18.3388	6.42	13.2136	10.6192	65.2981	21.2659	1.26145	8.17414	2.18544	1.64667	0.0120352	0.152505	0.00379665	3.07114	97.1019	31.1337	32.0629	73.912
2	2	Haylage	Agro-forestry	10	44	184.991	3.24179	13.6296	6.43	13.8142	10.6639	65.4194	21.1417	1.25326	8.15343	2.18291	1.66247	0.0194322	0.161763	0.00562932	3.09503	97.5444	31.2321	32.0184	73.8474
3	3	Corn silage	Potato peel	5	58	242.843	6.63321	27.7729	6.37	15.8438	12.6107	64.7507	15.9482	1.20007	14.0294	2.34455	1.31472	0.00846939	0.394346	0.00953399	4.06085	125.828	37.9898	30.1919	72.2814
3	3	Corn silage	Potato peel	5	58	242.843	6.88363	28.8214	6.35	17.2712	11.8626	64.9159	15.9141	1.20901	13.9329	2.32476	1.28953	0.0118442	0.393016	0.00897869	4.07994	118.229	35.615	30.1236	72.2284
3	3	Corn silage	Potato peel	5	59	247.03	7.03482	29.4544	6.35	23.1234	10.6242	64.031	16.1217	1.26156	14.3085	2.48628	1.35273	0.0100834	0.417258	0.0109089	3.97173	106.115	32.7254	30.8397	72.4452
3	3	Haylage	Potato peel	5	41	172.868	4.13706	17.4431	6.37	19.4045	10.3701	65.444	18.0939	1.30783	10.9788	2.45276	1.4304	0.0087281	0.280821	0.00279296	3.61691	98.7069	29.9838	30.3766	72.8561
3	3	Haylage	Potato peel	5	43	181.301	4.23267	17.8462	6.42	20.8419	10.8441	66.2272	18.0253	1.26247	10.6184	2.25132	1.33712	0.0102645	0.256869	0.0110824	3.67412	102.945	30.8489	29.9665	72.7205
3	3	Haylage	Potato peel	5	44	185.517	4.24933	17.9164	6.39	26.5914	10.3811	65.6483	18.1092	1.25687	10.9071	2.3823	1.3902	0.026124	0.273627	0.00634491	3.62514	98.771	29.9582	30.331	72.8346
3	3	Corn silage	Agro-forestry	5	60	251.217	7.08321	29.657	6.36	24.2653	9.90996	63.8811	16.0429	1.28023	14.5145	2.4789	1.35741	0.00759715	0.420547	0.0168276	3.98192	99.1876	30.7347	30.9865	72.4444
3	3	Corn silage	Agro-forestry	5	59	247.03	7.1017	29.7345	6.33	18.2703	11.3362	64.1413	15.9847	1.23761	14.4436	2.4315	1.33209	0.0126119	0.400741	0.0158474	4.01268	113.483	34.8395	30.7002	72.3882
3	3	Corn silage	Agro-forestry	5	56	234.469	7.04096	29.4801	6.31	25.6926	10.6131	64.1305	16.1753	1.23704	14.3141	2.38042	1.33394	0.011525	0.404753	0.012467	3.9647	106.016	32.7434	30.8853	72.4551
3	3	Haylage	Agro-forestry	5	42	177.084	3.9996	16.8635	6.41	19.692	9.78694	65.686	18.0268	1.27927	10.9014	2.40696	1.41096	0.0116178	0.267131	0.00977047	3.64386	93.1449	28.1657	30.2386	72.797
3	3	Haylage	Agro-forestry	5	46	193.95	4.48327	18.9028	6.37	7.14937	9.48054	65.4653	18.1832	1.27982	10.968	2.4046	1.41118	0.0105897	0.26903	0.00818958	3.60031	90.2216	27.5917	30.5821	72.888
3	3	Haylage	Agro-forestry	5	46	193.95	4.58642	19.3377	6.38	14.2987	10.267	66.4627	17.937	1.2028	10.5646	2.23532	1.32661	0.0211251	0.245913	0.00382258	3.70544	97.5211	29.1507	29.8917	72.6541
3	3	Corn silage	Potato peel	10	57	238.07	6.60772	27.5983	6.37	15.2539	10.5967	64.9926	15.8387	1.20274	14.0042	2.30179	1.27673	0.00810172	0.365318	0.0098606	4.10342	106.052	32.0183	30.1911	72.2128
3	3	Corn silage	Potato peel	10	55	229.717	6.35832	26.5566	6.34	30.5079	10.6947	64.4079	15.867	1.23013	14.3233	2.39864	1.33499	0.00986081	0.413432	0.0147461	4.05924	107.259	32.6461	30.4367	72.3059
3	3	Corn silage	Potato peel	10	59	246.424	7.17418	29.9642	6.34	40.995	10.6204	64.714	15.9592	1.2202	14.0063	2.3801	1.30703	0.010131	0.384639	0.0184309	4.05499	106.181	32.3216	30.44	72.2902
3	3	Haylage	Potato peel	10	42	176.582	4.33487	18.2252	6.37	20.1534	10.1201	66.0243	18.0126	1.24934	10.775	2.32172	1.35517	0.00822744	0.247924	0.00563334	3.6655	96.5302	29.0748	30.1199	72.7453
3	3	Haylage	Potato peel	10	41	172.378	4.11797	17.3133	6.37	23.855	9.86743	65.7199	18.0309	1.28525	10.9054	2.38425	1.39073	0.0063292	0.270973	0.00620573	3.64488	94.1802	28.4929	30.2536	72.7963
3	3	Haylage	Potato peel	10	39	163.969	3.77902	15.8882	6.4	20.0163	9.91725	65.8963	17.8794	1.27546	10.8475	2.39447	1.41604	0.0163916	0.267022	0.00742897	3.68561	94.6746	28.3915	29.9885	72.7152
3	3	Corn silage	Agro-forestry	10	55	229.717	6.4281	26.8481	6.35	22.6085	9.92754	63.8795	16.1433	1.25817	14.2851	2.43462	1.31572	0.266798	0.404585	0.0122394	3.95708	99.1471	30.6144	30.8777	72.4697
3	3	Corn silage	Agro-forestry	10	56	233.894	6.65897	27.8123	6.33	17.2969	10.0946	63.7029	16.4745	1.23925	14.3627	2.44369	1.344	0.021954	0.391858	0.0192681	3.86677	100.982	31.5535	31.2468	72.6211
3	3	Corn silage	Agro-forestry	10	53	221.364	6.93454	28.9633	6.34	28.8735	10.2754	64.0708	16.3434	1.24354	14.1823	2.40662	1.31953	0.00767293	0.409376	0.0167418	3.92028	102.671	31.824	30.9961	72.5186
3	3	Haylage	Agro-forestry	10	36	151.356	3.93103	16.5274	6.42	10.6936	9.00627	65.5891	18.0363	1.30685	10.9733	2.39815	1.39528	0.014093	0.280016	0.00696129	3.63651	85.9811	26.0954	30.3502	72.8159
3	3	Haylage	Agro-forestry	10	37	155.56	.	.	6.41	26.8712	8.91538	65.3409	18.0683	1.3065	11.123	2.43981	1.41038	0.0108339	0.290903	0.00942391	3.61634	85.2204	25.3595	29.7575	72.8663
3	3	Haylage	Agro-forestry	10	36	151.356	4.12726	17.3524	6.39	33.1777	9.4284	65.6171	18.1672	1.29196	10.8916	2.3616	1.38857	0.00691921	0.267482	0.00756974	3.61185	89.9101	27.3625	30.4332	72.8589

## Sheet: Control
Run	Donor cow	Substrate	Biochar	Total gas, mL	Total gas, mL/g DM	CH4, mL	CH4, mL/gDM	pH	NH3-N, mg/gDM	Total VFA, mmol/g DM	Acetic acid %	Propionic acid %	Iso-butyric acid, %	Butyric acid, %	Iso-valeric acid, %	Valeric acid, %	Iso-caproic acid, %	Caproic acid, %	Enanthic acid, %	Acetic:propionic acid ratio	H2 generated, mmol/L	H2 consumed, mmol/L	Recovery, %	Fermentation eEfficiency, %
1	1	Corn silage	None	60	251.836	3.69027	15.4891	6.3	18.6516	10.1548	62.8682	19.5486	1.21749	12.5661	1.97046	1.35405	0.0125193	0.430366	0.0321465	3.21638	97.8394	32.3295	33.0435	73.7886
1	1	Corn silage	None	58	243.442	3.45902	14.5185	6.34	11.5687	10.1724	63.4867	19.461	1.19118	12.1901	1.89191	1.31218	0.00999332	0.421999	0.034862	3.2623	97.7195	31.8994	32.6438	73.6648
1	1	Corn silage	None	60	251.836	3.75443	15.7584	6.28	24.554	10.7574	63.3932	19.5216	1.18674	12.2086	1.92393	1.31056	0.0130951	0.416683	0.0256754	3.24734	103.341	33.7795	32.6873	73.6989
1	2	Corn silage	None	62	260.231	3.90411	16.3866	6.27	13.7723	10.8161	61.2313	21.5785	1.15648	11.7168	2.31953	1.50308	0.0118221	0.454642	0.0277874	2.8376	102.331	35.7233	34.9095	74.7123
1	2	Corn silage	None	62	260.231	4.10025	17.2099	6.24	14.7167	10.8514	60.929	21.5777	1.18553	11.9315	2.36993	1.50984	0.0130793	0.455914	0.0275292	2.82376	102.855	36.0688	35.0676	74.761
1	2	Corn silage	None	64	268.625	4.23525	17.7765	6.29	12.6705	10.6219	60.3227	21.6827	1.22867	12.2413	2.4571	1.54137	0.0227277	0.476683	0.0267819	2.78294	100.866	35.8012	35.4937	74.8892
1	1	Haylage	None	44	186.047	2.39348	10.1204	6.37	13.6364	9.11977	65.27	19.7065	1.26263	9.87677	1.96864	1.50484	0.00985229	0.379215	0.0216208	3.31339	84.848	26.6263	31.3812	73.4232
1	1	Haylage	None	43	181.818	1.13128	4.78342	6.35	13.3192	8.20537	65.6907	19.544	1.21106	9.72983	1.90203	1.48416	0.0259222	0.387938	0.0243554	3.36143	76.3117	23.6906	31.0445	73.3175
1	1	Haylage	None	44	186.047	3.57984	15.1367	6.35	14.3499	8.96144	65.3913	19.5559	1.23869	9.88415	1.97726	1.5122	0.02424	0.39411	0.0221661	3.34409	83.4417	25.7869	30.9041	73.36
1	2	Haylage	None	46	194.503	2.81631	11.9083	6.34	15.4598	8.83731	64.8878	19.4932	1.28221	9.75408	2.49699	1.63564	0.0107659	0.414261	0.025006	3.32888	82.1588	25.7435	31.3338	73.3913
1	2	Haylage	None	49	207.188	2.70223	11.4259	6.34	14.9841	8.8842	64.9915	19.5357	1.25177	9.75095	2.4306	1.59603	0.0155235	0.40326	0.0246693	3.32695	82.6056	25.7713	31.198	73.3939
1	2	Haylage	None	49	207.188	4.24894	17.9659	6.31	11.6543	9.46881	64.8948	19.6583	1.24884	9.74941	2.40594	1.60591	0.0117091	0.403491	0.0215306	3.30122	87.9938	27.5004	31.2527	73.4521
2	1	Corn silage	None	65	272.823	5.99762	25.1736	6.39	8.34574	15.5272	67.5084	14.4505	1.12326	12.6923	2.29225	1.24837	0.0117508	0.627208	0.0459487	4.67457	153.378	41.6598	27.1616	71.3158
2	1	Corn silage	None	67	281.217	3.28642	13.794	6.34	10.4688	15.0386	66.9182	14.6751	1.16691	12.7764	2.42677	1.33051	0.0124826	0.648524	0.0451613	4.5605	148.437	40.8969	27.5517	71.4796
2	1	Corn silage	None	65	272.823	6.33655	26.5962	6.35	13.1043	14.076	66.2481	14.7724	1.22627	13.0024	2.59125	1.38431	0.0147679	0.717232	0.0432449	4.48484	138.978	38.7299	27.8677	71.5888
2	2	Corn silage	None	59	247.639	3.49616	14.6743	6.37	14.7881	13.3191	63.8288	19.9405	1.09514	11.7138	1.84452	1.36351	0.0101079	0.196871	0.00670299	3.20096	127.487	41.6753	32.6898	73.7782
2	2	Corn silage	None	59	247.639	5.17683	21.7286	6.36	11.7133	12.6351	63.2138	20.0376	1.12549	12.028	1.95518	1.41136	0.0161031	0.205484	0.00702481	3.15521	121.175	40.016	33.0232	73.8837
2	2	Corn silage	None	60	251.836	3.96031	16.6225	6.35	16.3986	12.8855	63.6388	19.9932	1.1115	11.7009	1.94253	1.37466	0.0168778	0.215194	0.0063218	3.18312	123.231	40.4287	32.8073	73.8146
2	1	Haylage	None	52	219.873	4.4967	19.0135	6.39	13.0537	14.1545	68.2392	15.9563	1.18982	10.3404	2.34997	1.43914	0.00979425	0.451201	0.0241251	4.27841	134.821	36.6462	27.1813	71.6827
2	1	Haylage	None	54	228.33	4.6998	19.8723	6.42	13.1275	12.6266	66.893	16.3061	1.2746	10.8512	2.56906	1.56537	0.00890745	0.505341	0.0264355	4.10247	120.492	33.7268	27.9909	71.9879
2	1	Haylage	None	51	215.645	4.08713	17.2817	6.41	19.1012	13.6659	68.277	15.7829	1.21161	10.4068	2.38311	1.45243	0.0120545	0.455696	0.0184413	4.32757	130.331	34.9672	26.8296	71.6109
2	2	Haylage	None	43	181.818	2.61803	11.0699	6.41	13.1275	12.4188	67.147	20.6854	1.08851	7.54298	1.88868	1.48778	0.012609	0.142746	0.00427544	3.24661	112.73	34.6563	30.7428	73.4624
2	2	Haylage	None	43	181.818	2.56182	10.8322	6.44	11.5787	12.6911	67.3742	20.6025	1.09197	7.41555	1.87232	1.48803	0.0157361	0.133466	0.00621776	3.27082	115.095	35.016	30.4236	73.3942
2	2	Haylage	None	43	181.818	2.35678	9.96524	6.42	13.275	12.2495	66.9461	20.8075	1.11182	7.5455	1.90682	1.516	0.0152574	0.145076	0.00590243	3.21744	111.089	34.1803	30.7684	73.5311
3	3	Corn silage	None	63	264.428	7.12718	29.9147	6.36	18.0032	11.336	63.772	16.1864	1.23811	14.5381	2.43782	1.34281	0.0274523	0.429659	0.0276424	3.93987	113.133	35.0842	31.0114	72.5123
3	3	Corn silage	None	62	260.231	7.26938	30.5116	6.33	18.1723	11.0179	63.9599	16.1955	1.23368	14.4109	2.41451	1.33789	0.0188133	0.410754	0.0181201	3.94928	109.863	34.0313	30.976	72.4879
3	3	Corn silage	None	62	260.231	7.65955	32.1492	6.33	18.4585	11.6869	63.9273	16.2545	1.22781	14.403	2.41422	1.32264	0.0162195	0.41764	0.0166397	3.93291	116.495	36.1339	31.0176	72.5126
3	3	Haylage	None	42	177.59	4.3013	18.1873	6.37	25.5141	10.0839	65.4345	18.2366	1.26499	10.9411	2.40385	1.42021	0.0182644	0.271463	0.00898814	3.5881	95.641	29.2163	30.5479	72.9096
3	3	Haylage	None	44	186.047	4.45008	18.8164	6.4	18.5954	13.1323	67.8068	17.7542	1.09488	9.87936	1.97894	1.23505	0.0187195	0.224663	0.00740511	3.8195	123.805	35.8197	28.9324	72.3973
3	3	Haylage	None	8	33.8266	0.671978	2.84134	6.55	16.1445	9.50937	65.4688	18.2695	1.31402	10.8095	2.41653	1.41888	0.0198293	0.274609	0.00824845	3.58351	90.0125	26.9066	29.8921	72.9108
